# Supplementary material for: An aromatic/aliphatic polyester prepared via ring-opening polymerisation and its remarkably selective and cyclable depolymerisation to monomer
Source: Royal Society of Chemistry journal article supplement (doi:10.1039/c5py01606a), 2015-11-12
Supplement: c5py01606a1.pdf [file c5py01606a1.pdf]

## Supporting Information for

# An aromatic/aliphatic polyester prepared *via* ring-opening polymerisation and its remarkably selective and cyclable depolymerisation to monomer

Jarret P. MacDonald and Michael P. Shaver\*

EaStCHEM, School of Chemistry, University of Edinburgh, Joseph Black Building,  
David Brewster Road, EH9 3FJ, Edinburgh, UK. E-mail: michael.shaver@ed.ac.uk;  
Tel: +44 (0)131 650 4726

## Table of Contents

|                                                                                                                                                                                                                                                                                         |     |
|-----------------------------------------------------------------------------------------------------------------------------------------------------------------------------------------------------------------------------------------------------------------------------------------|-----|
| Table S1 Polymerisation of 2,3-DHB using Sn(oct) <sub>2</sub>                                                                                                                                                                                                                           | S2  |
| Table S2 Polymerisation of 2,3-DHB using MeAl[salen]                                                                                                                                                                                                                                    | S2  |
| Table S3 Polymerisation of 2,3-DHB using organocatalysts                                                                                                                                                                                                                                | S2  |
| Table S4 Rate of 2,3-DHB polymerisation                                                                                                                                                                                                                                                 | S3  |
| Figure S1 Catalysts attempted for 2,3-DHB polymerisation                                                                                                                                                                                                                                | S3  |
| Figure S2 <sup>1</sup> H (bottom) and <sup>13</sup> C{ <sup>1</sup> H} (top) NMR spectra of P2HEB                                                                                                                                                                                       | S3  |
| Effect of temperature on polymer-monomer equilibrium                                                                                                                                                                                                                                    | S4  |
| Table S5 Polymerisation of P(L-LA <sub>n</sub> - <i>b</i> -2HEB <sub>m</sub> )                                                                                                                                                                                                          | S4  |
| Table S6 Polymerisation of P(L-LA <sub>n</sub> - <i>b</i> -2HEB <sub>m</sub> -L-LA <sub>n</sub> )                                                                                                                                                                                       | S4  |
| Figure S3 P(L-LA) methine region for P(L-LA <sub>n</sub> - <i>b</i> -3HES <sub>m</sub> - <i>b</i> -L-LA <sub>n</sub> ) where n = 100, m = 40 (top left); n = 100, m = 200 (top right); and n = 20, m = 200 (bottom). • = residual lactide, * = residual CH <sub>2</sub> Cl <sub>2</sub> | S5  |
| Table S7 Thermal decomposition on P2HEB and copolymers                                                                                                                                                                                                                                  | S5  |
| Figure S4 TGA traces for P2HEB and copolymers with L-lactide                                                                                                                                                                                                                            | S6  |
| Depolymerisation of P2HEB with MeAl[salen]                                                                                                                                                                                                                                              | S6  |
| Figure S5 <sup>1</sup> H NMR spectra for depolymerisation of P2HEB at 60°C at 0h, 2h, 6h and 1h.                                                                                                                                                                                        | S7  |
| Table S8 Depolymerisation of P2HEB catalysed by MeAl[salen] at 60°C                                                                                                                                                                                                                     | S7  |
| Concentration dependent reversible polymerisation of 2,3-DHB                                                                                                                                                                                                                            | S7  |
| Figure S6 Expanded GPC chromatograms (15 and 30 minutes) for concentration dependent reversible polymerisation shown in Figure 1                                                                                                                                                        | S8  |
| Depolymerisation of P(3HB- <i>b</i> -2HEB) with MeAl[salen]                                                                                                                                                                                                                             | S8  |
| Figure S7 <sup>1</sup> H NMR spectra of crude samples for synthesis of P3HB (bottom), P(3HB- <i>b</i> -2HEB) (middle) and depolymerisation of copolymer (top) in CDCl <sub>3</sub> , * = residual solvent                                                                               | S9  |
| Table S9 Determination of [2,3-DHB] <sub>eq</sub> by ROP with MeAl[salen] at 60°C in toluene                                                                                                                                                                                            | S9  |
| Table S10 Determination of [2,3-DHB] <sub>eq</sub> by depolymerisation of P2HEB with MeAl[salen] at 60°C in C <sub>6</sub> D <sub>6</sub>                                                                                                                                               | S9  |
| Table S11 Thermal properties of P2HEB and P(l-LA- <i>b</i> -2HEB- <i>b</i> -l-LA)                                                                                                                                                                                                       | S10 |
| References                                                                                                                                                                                                                                                                              | S10 |

**Table S1** Polymerisation of 2,3-DHB using Sn(oct)<sub>2</sub><sup>a</sup>

| Temperature<br>(°C) | Time (h) | Conversion <sup>b</sup><br>(%) | M <sub>n,th</sub> <sup>c</sup> | M <sub>n</sub> <sup>b</sup> | Đ <sup>d</sup> |
|---------------------|----------|--------------------------------|--------------------------------|-----------------------------|----------------|
| 70                  | 3        | 0                              | -                              | -                           | -              |
| 120                 | 3        | 58                             | 9060                           | 8300                        | 1.23           |
| 120                 | 6        | 61                             | 10100                          | 11400                       | 1.44           |

<sup>a</sup> Polymerisation of 2,3-DHB in toluene with [2,3-DHB]<sub>0</sub>: [Sn]<sub>0</sub>: [BnOH]<sub>0</sub> = 100:0.5:1. <sup>b</sup> Determined by <sup>1</sup>H NMR spectroscopy. <sup>c</sup> M<sub>n,th</sub> = ([2,3-DHB]<sub>0</sub>/[BnOH]<sub>0</sub>) × % conversion × MW<sub>2,3-DHB</sub>. <sup>d</sup> Determined by gel permeation chromatography.

**Table S2** Polymerisation of 2,3-DHB using MeAl[salen]<sup>a</sup>

| Temperature<br>(°C) | Solvent | Time<br>(h) | Conversion <sup>b</sup><br>(%) | M <sub>n,th</sub> <sup>c</sup> | M <sub>n</sub> <sup>b</sup> | Đ <sup>d</sup> |
|---------------------|---------|-------------|--------------------------------|--------------------------------|-----------------------------|----------------|
| 120                 | neat    | 3           | 66                             | 10960                          | 11000                       | 1.60           |
| 120                 | toluene | 3           | 56                             | 9230                           | 9310                        | 1.76           |
| 70                  | neat    | 1           | 64                             | 10580                          | 10760                       | 1.13           |
| 70                  | toluene | 3           | 75                             | 12370                          | 12510                       | 1.16           |
| 70                  | toluene | 3           | 75                             | 12370                          | 14240                       | 1.17           |

<sup>a</sup> Polymerisation of 2,3-DHB with [2,3-DHB]<sub>0</sub>: [Al]<sub>0</sub>: [BnOH]<sub>0</sub> = 100:1:1. <sup>b</sup> Determined by <sup>1</sup>H NMR spectroscopy. <sup>c</sup> M<sub>n,th</sub> = ([2,3-DHB]<sub>0</sub>/[BnOH]<sub>0</sub>) × % conversion × MW<sub>2,3-DHB</sub>. <sup>d</sup> Determined by gel permeation chromatography.

**Table S3** Polymerisation of 2,3-DHB using organocatalysts

| Catalyst | Solvent                         | [M] <sub>0</sub> | [M] <sub>0</sub> /<br>[Al] <sub>0</sub> | Temp.<br>(°C) | Time<br>(min) | Conv. <sup>a</sup><br>(%) | M <sub>n,th</sub> <sup>b</sup> | M <sub>n</sub> <sup>a</sup> | Đ <sup>c</sup> |
|----------|---------------------------------|------------------|-----------------------------------------|---------------|---------------|---------------------------|--------------------------------|-----------------------------|----------------|
| DBU      | toluene                         | 0.52             | 100                                     | 22            | 180           | 0                         | -                              | -                           | -              |
|          | toluene                         | 1.30             | 100                                     | 22            | 180           | 0                         | -                              | -                           | -              |
| DPP      | toluene                         | 1.30             | 100                                     | 22            | 360           | 0                         | -                              | -                           | -              |
|          | toluene                         | 1.30             | 100                                     | 50            | 360           | 0                         | -                              | -                           | -              |
| TBD      | toluene                         | 0.52             | 100                                     | 22            | 190           | 51                        | 7990                           | 6370                        | 1.14           |
|          | toluene                         | 1.30             | 100                                     | 22            | 60            | 80                        | 13240                          | 13130                       | 1.14           |
|          | toluene                         | 2.38             | 100                                     | 22            | 30            | 89                        | 14720                          | 14660                       | 1.19           |
|          | toluene                         | 1.30             | 200                                     | 22            | 240           | 78                        | 24080                          | 22450                       | 1.15           |
|          | toluene                         | 1.30             | 500                                     | 22            | 360           | 29                        | 23620                          | 14390                       | 1.42           |
|          | toluene                         | 1.30             | 100                                     | 50            | 60            | 46                        | 7660                           | 8710                        | 1.11           |
|          | CH <sub>2</sub> Cl <sub>2</sub> | 1.30             | 100                                     | 22            | 120           | 60                        | 9960                           | 9760                        | 1.14           |

<sup>a</sup> Determined by <sup>1</sup>H NMR spectroscopy. <sup>b</sup> M<sub>n,th</sub> = ([2,3-DHB]<sub>0</sub>/[BnOH]<sub>0</sub>) × % conversion × MW<sub>2,3-DHB</sub>. <sup>c</sup> Determined by gel permeation chromatography.

**Table S4** Rate of 2,3-DHB polymerisation

| Catalyst    | Temperature (°C) | Concentration (M) | Rate (min <sup>-1</sup> ) |
|-------------|------------------|-------------------|---------------------------|
| MeAl[salen] | 60               | 5.3               | 0.010                     |
|             | 50               | 5.3               | 0.007                     |
|             | 22               | 5.3               | 0.005                     |
| TBD         | 22               | 2.4               | 0.045                     |
|             | 22               | 1.4               | 0.016                     |
|             | 22               | 0.5               | 0.003                     |

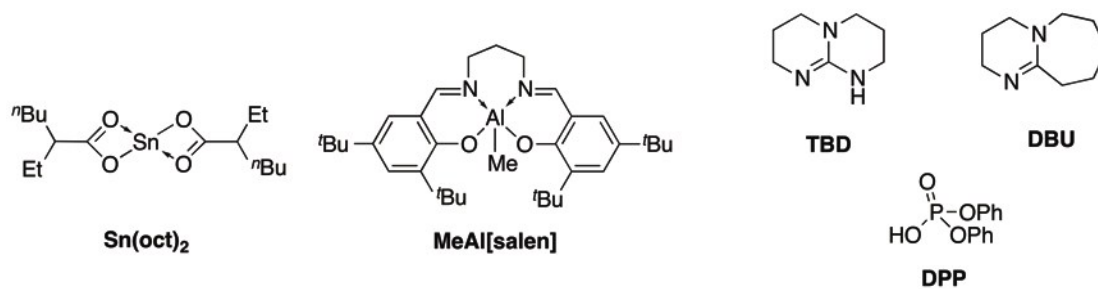**Figure S1** Catalysts attempted for 2,3-DHB polymerisation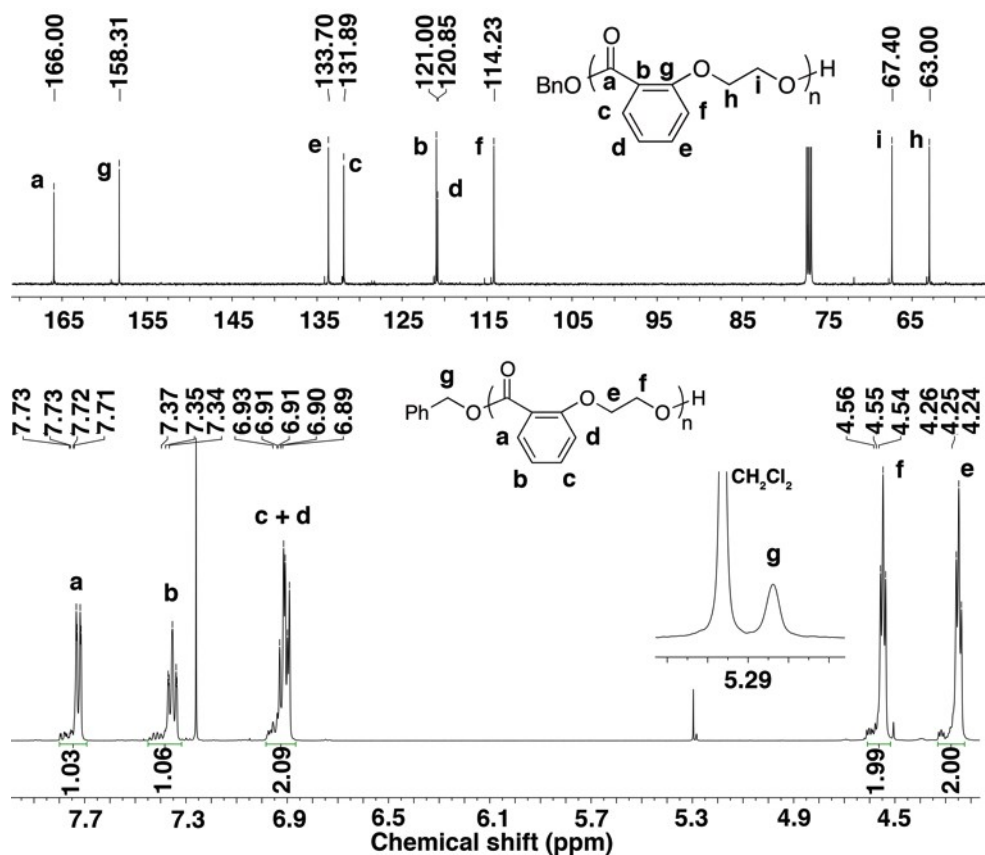**Figure S2** <sup>1</sup>H (bottom) and <sup>13</sup>C{<sup>1</sup>H} (top) NMR spectra of P2HEB in CDCl<sub>3</sub>

### Effect of temperature on polymer-monomer equilibrium

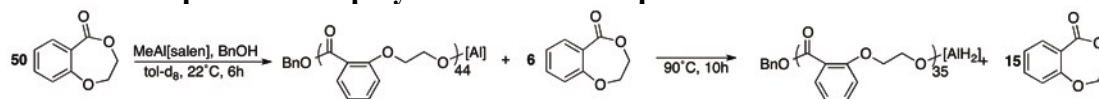

In a glovebox, MeAl[salen] (9.3 mg, 0.02 mmol), 2,3-DHB (140 mg, 0.85 mmol), benzyl alcohol (1.8  $\mu$ L, 0.02 mmol) and toluene- $d_8$  (300 mg) were added to a Young's tap NMR tube. The NMR tube was then left at room temperature for six hours.  $^1\text{H}$  NMR spectroscopy revealed that the polymerisation had reached 88% conversion ( $n = 44$ ). The NMR tube was then heated to  $90^\circ\text{C}$  for 10 hours.  $^1\text{H}$  NMR spectroscopy revealed that polymer conversion had decreased to 70% ( $n = 35$ ). Conversion could be increased by leaving the reaction to cool.

**Table S5** Polymerisation of P(L-LA $_n$ -*b*-2HEB $_m$ )

| Target |     | Experimental <sup>a</sup> |     | $M_{n,th}$ <sup>b</sup> | $M_n$ <sup>a</sup> | $\bar{D}$ <sup>c</sup> |
|--------|-----|---------------------------|-----|-------------------------|--------------------|------------------------|
| n      | m   | n                         | m   |                         |                    |                        |
| 100    | 20  | 100                       | 18  | 10030                   | 10990              | 1.10                   |
| 100    | 100 | 100                       | 93  | 20830                   | 12380              | 1.13                   |
| 20     | 100 | 20                        | 100 | 15390                   | 10630              | 1.15                   |

<sup>a</sup> Determined by  $^1\text{H}$  NMR spectroscopy. <sup>b</sup>  $M_{n,th} = (n \times \% \text{ conv.}_{LA} \times 144.13) + (m \times \% \text{ conv.}_{2,3\text{-DHB}} \times 164.16) + 108.14$ . <sup>c</sup> Determined by gel permeation chromatography.

**Table S6** Polymerisation of P(L-LA $_n$ -*b*-2HEB $_m$ -*b*-L-LA $_n$ )

| Target |     | Experimental <sup>a</sup> |    | $M_{n,th}$ <sup>b</sup> | $M_n$ <sup>a</sup> | $\bar{D}$ <sup>c</sup> |
|--------|-----|---------------------------|----|-------------------------|--------------------|------------------------|
| n      | m   | n                         | m  |                         |                    |                        |
| 100    | 20  | 89                        | 17 | 15690                   | 17900              | 1.08                   |
| 100    | 100 | 100                       | 85 | 28440                   | 22400              | 1.13                   |
| 20     | 100 | 20                        | 86 | 16750                   | 13460              | 1.16                   |

<sup>a</sup> Determined by  $^1\text{H}$  NMR spectroscopy. <sup>b</sup>  $M_{n,th} = (n \times \% \text{ conv.}_{LA} \times 144.13) + (m \times \% \text{ conv.}_{2,3\text{-DHB}} \times 164.16) + 76.09$ . <sup>c</sup> Determined by gel permeation chromatography.

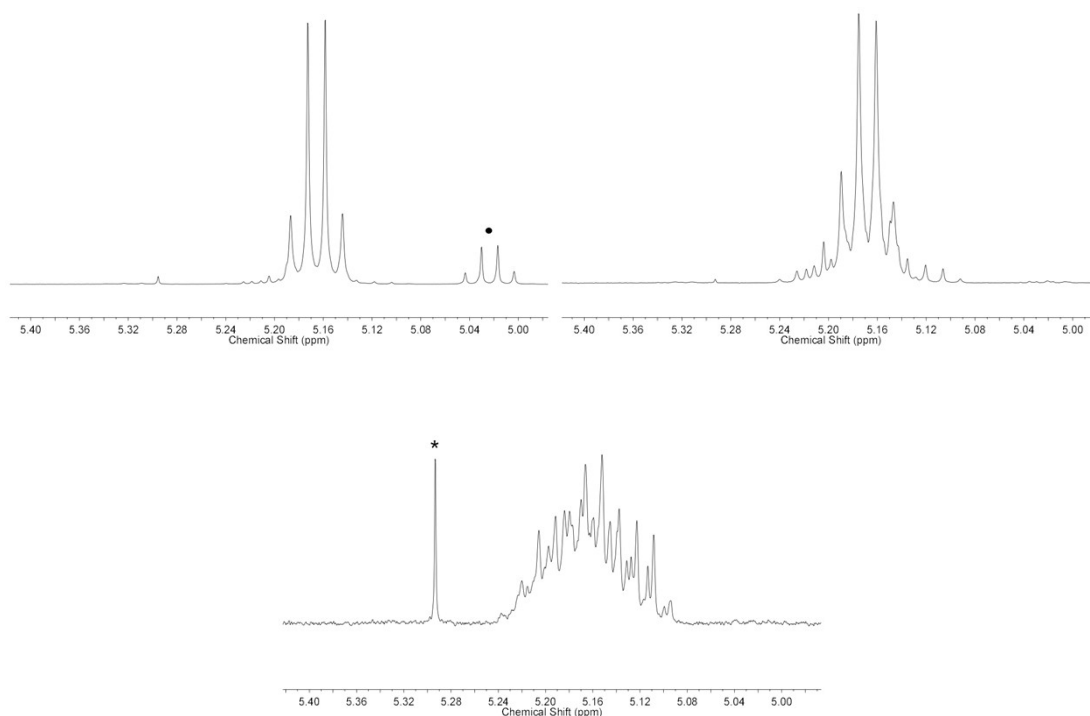

**Figure S3** P(L-LA) methine region for P(L-LA<sub>n</sub>-*b*-3HEB<sub>m</sub>-*b*-L-LA<sub>n</sub>) where n = 100, m = 40 (top left); n = 100, m = 200 (top right); and n = 20, m = 200 (bottom). • = residual lactide, \* = residual CH<sub>2</sub>Cl<sub>2</sub>.

**Table S7** Thermal decomposition on P2HEB and copolymers

| Polymer                                                                                  | $T_{d,onset}$ (°C) | $T_{d,endpoint}$ (°C) |
|------------------------------------------------------------------------------------------|--------------------|-----------------------|
| P2HEB <sub>82</sub>                                                                      | 219.3              | 262.8                 |
| P(L-LA <sub>100</sub> - <i>b</i> -2HEB <sub>170</sub> - <i>b</i> - L-LA <sub>100</sub> ) | 251.2              | 310.7                 |
| P(L-LA <sub>100</sub> - <i>b</i> -2HEB <sub>34</sub> - <i>b</i> - L-LA <sub>100</sub> )  | 278.7              | 319.3                 |
| P(L-LA <sub>100</sub> - <i>b</i> -2HEB <sub>17</sub> )                                   | 273.3              | 321.2                 |
| P(L-LA <sub>16</sub> - <i>b</i> -2HEB <sub>84</sub> )                                    | 263.1              | 307.8                 |
| P(3HB <sub>50</sub> - <i>b</i> -2HEB <sub>50</sub> )                                     | 244.1              | 338.0                 |

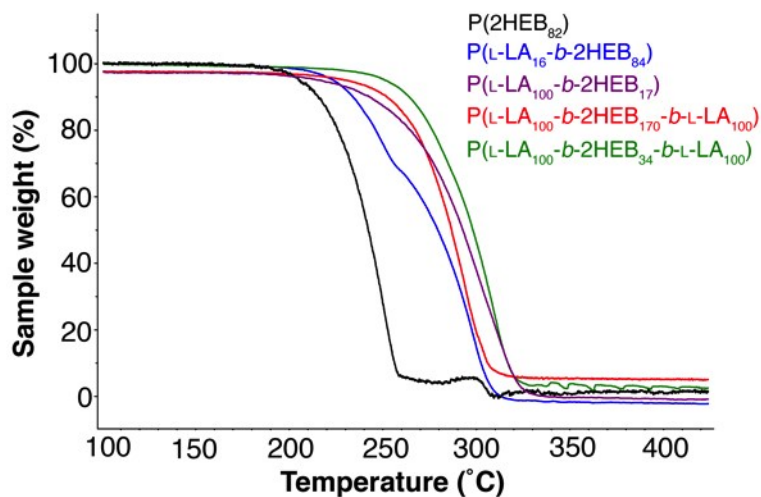

**Figure S4** TGA traces for P2HEB and copolymers with L-lactide

#### **Depolymerisation of P2HEB with MeAl[salen]**

In a glovebox, P2HEB (41 mg, 0.005 mmol) and MeAl[salen] (2.7 mg, 0.005 mmol) in C<sub>6</sub>D<sub>6</sub> (0.4 mL) were added to a J. Young NMR tube. The NMR tube was sealed and heated at 70°C for 12h. After 12h, the NMR tube was cooled to room temperature and <sup>1</sup>H NMR analysis indicated the solution contained a mixture of 2,3-DHB:P2HEB = 92:8.

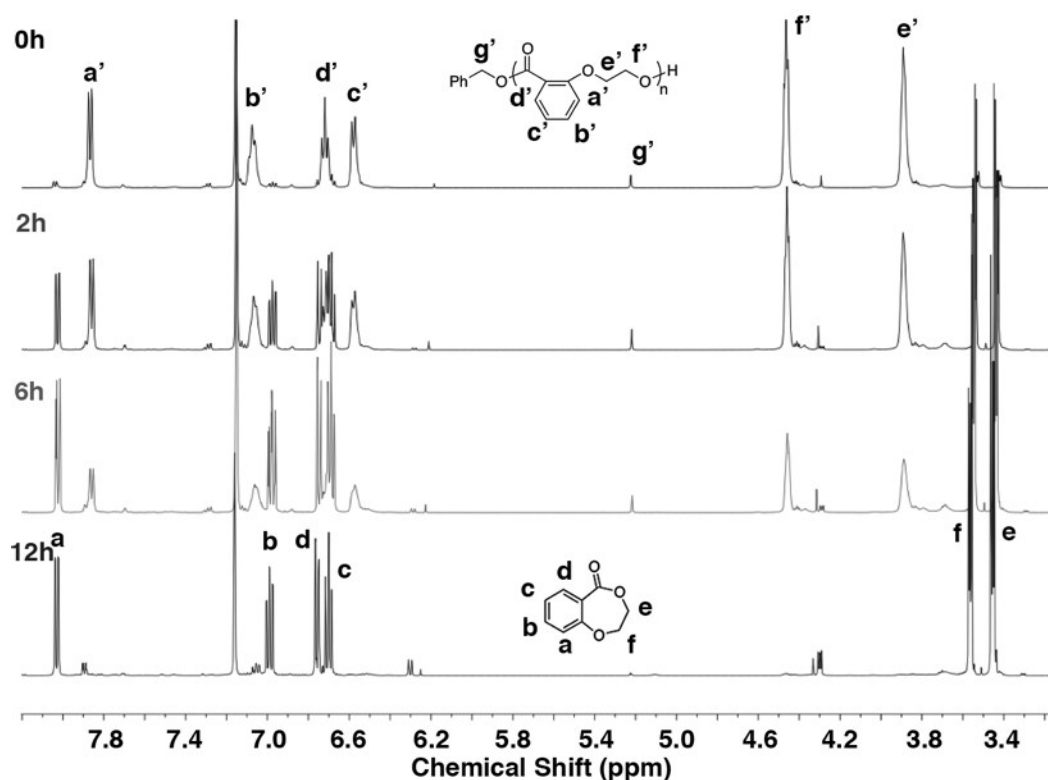

**Figure S5**  $^1\text{H}$  NMR spectra for depolymerisation of P2HEB at  $60^\circ\text{C}$  at 0h, 2h, 6h and 12h.

**Table S8** Depolymerisation of P2HEB catalysed by  $\text{MeAl}[\text{salen}]$  at  $60^\circ\text{C}$ <sup>a</sup>

| Time (h) | Conversion (%) <sup>b</sup> |
|----------|-----------------------------|
| 2        | 39                          |
| 4        | 59                          |
| 12       | 92                          |

<sup>a</sup> Depolymerisation of P2HEB with  $\text{MeAl}[\text{salen}]$  with  $[\text{M}]_0 = 0.17\text{M}$  at  $60^\circ\text{C}$  in toluene.  $[\text{M}]_0 = (\text{mass polymer} / \text{MW}_{2,3\text{-DHB}}) / \text{volume toluene}$ . <sup>b</sup> Determined by  $^1\text{H}$  NMR spectroscopy.

### Concentration dependent reversible polymerisation of 2,3-DHB

In a glovebox, 2,3-DHB (116 mg, 0.71 mmol),  $\text{MeAl}[\text{salen}]$  (3.8 mg, 0.01 mmol),  $\text{BnOH}$  ( $0.7 \mu\text{L}$ , 0.01 mmol) and toluene (150 mg) were added to an ampoule. The ampoule was sealed and heated to  $60^\circ\text{C}$  for 6h. A sample was removed *via* syringe under nitrogen. GPC and  $^1\text{H}$  NMR spectroscopy analysis of the crude sample indicated 82% conversion to polymer. Dry toluene (3 mL) was then added to the ampoule and the reaction was stirred at  $60^\circ\text{C}$  for 16h. A sample was removed *via* syringe under nitrogen. GPC and  $^1\text{H}$  NMR spectroscopy analysis of the crude sample indicated conversion of 2,3-DHB to polymer had decreased to 6%. The reaction was then concentrated under reduced pressure and toluene ( $120 \mu\text{L}$ ) was then added. The reaction was stirred at  $60^\circ\text{C}$  for 6h. A sample was removed *via* syringe under nitrogen. GPC and  $^1\text{H}$  NMR spectroscopy analysis of the crude sample indicated 84% conversion to polymer.

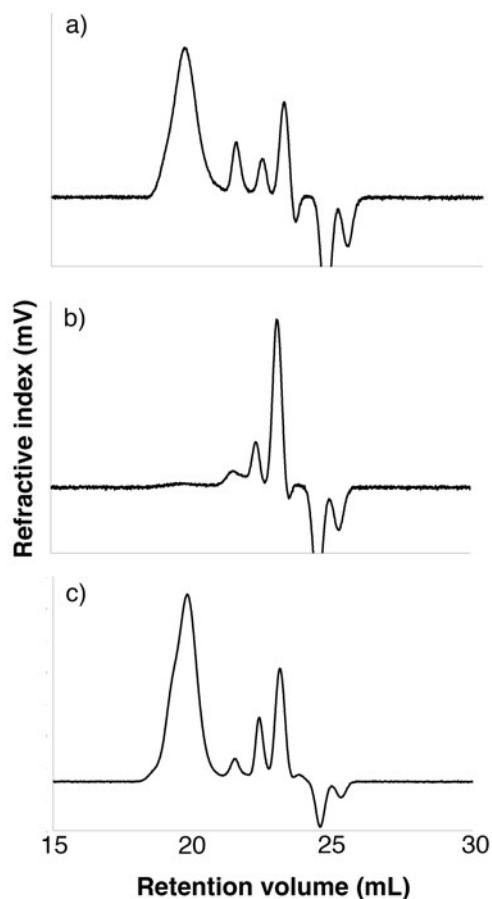

**Figure S6** Expanded GPC chromatograms (15 and 30 minutes) for concentration dependent reversible polymerisation shown in Figure 1

**Depolymerisation of P(3HB-*b*-2HEB) with MeAl[salen]**

P(3HB-*b*-2HEB) was prepared as described previously. In place of quenching, after two hours of 2,3-DHB polymerisation, toluene was added so that apparent  $[2,3\text{-DHB}]_0 = 0.2\text{M}$  and stirred at  $60^\circ\text{C}$  for 12 hours. After 12h, several drops of MeOH were added to the reaction and volatiles were removed under reduced pressure.  $^1\text{H}$  NMR spectroscopy indicated that P2HEB:2,3-DHB = 0.91:0.09. Analysis by gel permeation showed a decrease in polymer molecular weight, consistent with depolymerisation.



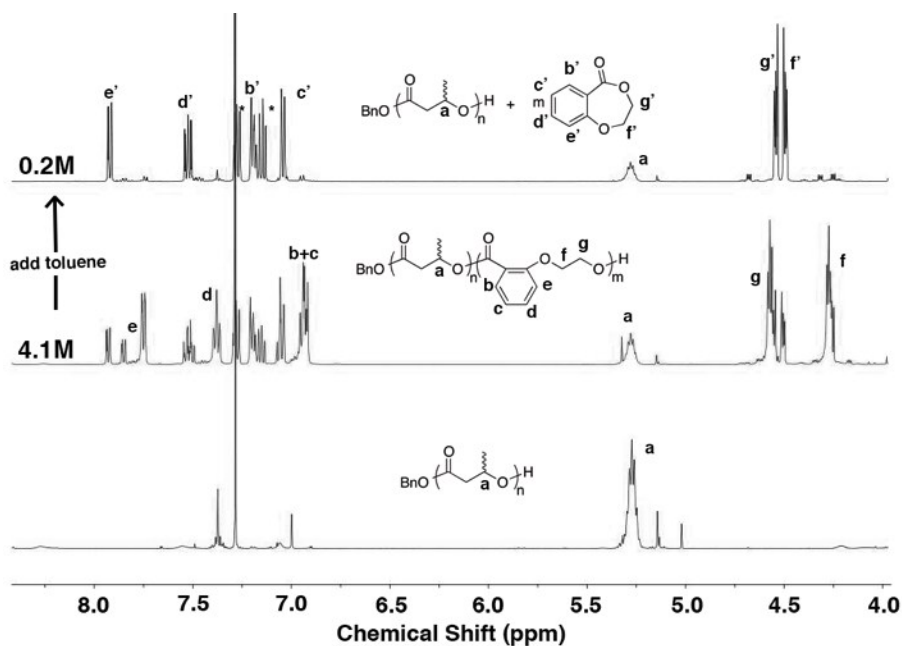

**Figure S7**  $^1\text{H}$  NMR spectra of crude samples for synthesis of P3HB (bottom), P(3HB-*b*-2HEB) (middle) and depolymerisation of copolymer (top) in  $\text{CDCl}_3$ , \* = residual solvent

**Table S9** Determination of  $[\text{2,3-DHB}]_{\text{eq}}$  by ROP with  $\text{MeAl}[\text{salen}]$  at  $60^\circ\text{C}$  in toluene<sup>a</sup>

| $[\text{2,3-DHB}]_0$ (M) | Composition <sup>b</sup> (%) |       | $[\text{2,3-DHB}]_{\text{eq}}$ (M) |
|--------------------------|------------------------------|-------|------------------------------------|
|                          | 2,3-DHB                      | P2HEB |                                    |
| 3.6                      | 10                           | 90    | 0.36                               |
| 3.9                      | 9                            | 91    | 0.35                               |
| 4.5                      | 8                            | 92    | 0.36                               |

<sup>a</sup> Depolymerisation of P2HEB in toluene at  $60^\circ\text{C}$  for six hours with  $[\text{2,3-DHB}]_0:[\mathbf{58}]_0:[\text{BnOH}]_0 = 50:1:1$ . <sup>b</sup> Determined by  $^1\text{H}$  NMR spectroscopy. <sup>c</sup>  $[\text{2,3-DHB}]_{\text{eq}} = (100 - \% \text{ conv.})/100 \times [\text{2,3-DHB}]_0$ .

**Table S10** Determination of  $[\text{2,3-DHB}]_{\text{eq}}$  by depolymerisation of P2HEB with  $\text{MeAl}[\text{salen}]$  at  $60^\circ\text{C}$  in  $\text{C}_6\text{D}_6$ <sup>a</sup>

| $[\text{2,3-DHB}]_0$ <sup>b</sup> (M) | Composition <sup>c</sup> (%) |       | $[\text{2,3-DHB}]_{\text{eq}}$ <sup>d</sup> (M) |
|---------------------------------------|------------------------------|-------|-------------------------------------------------|
|                                       | 2,3-DHB                      | P2HEB |                                                 |
| 1.88                                  | 19                           | 81    | 0.358                                           |
| 1.37                                  | 26                           | 74    | 0.355                                           |
| 0.99                                  | 34                           | 66    | 0.355                                           |

<sup>a</sup> Depolymerisation of P2HEB in  $\text{C}_6\text{D}_6$  at  $60^\circ\text{C}$  for 12 hours with  $\text{MeAl}[\text{salen}]$ . <sup>b</sup>  $[\text{2,3-DHB}]_0 = (\text{mass P2HEB}/164.16)/\text{volume C}_6\text{D}_6$ . <sup>c</sup> Determined by  $^1\text{H}$  NMR spectroscopy. <sup>d</sup>  $[\text{2,3-DHB}]_{\text{eq}} = [(\% \text{ conv.}/100) \times (\text{mass P2HEB}/164.16)]/\text{volume toluene}$ .

**Table S11** Thermal properties of P2HEB and P(l-LA<sub>100</sub>-b-2HEB<sub>170</sub>-b-l-LA<sub>100</sub>)

| Polymer                                                               | $T_g$ (°C) | $T_m$ (°C) | $T_{d,onset}$ (°C) | $T_{d,endpoint}$ (°C) |
|-----------------------------------------------------------------------|------------|------------|--------------------|-----------------------|
| P(l-LA <sub>100</sub> -b-2HEB <sub>170</sub> -b-l-LA <sub>100</sub> ) | 51.3       | 124.8      | 251.2              | 310.7                 |
| P2HEB <sub>82</sub>                                                   | -          | 78.2       | 219.3              | 262.8                 |

<sup>a</sup> DSC samples were heated at 10°C min<sup>-1</sup> to 150°C and held for 10 minutes to remove residual solvent and cooled to room temperature at 10°C min<sup>-1</sup>.  $T_g$  and  $T_m$  were obtained on the second heating cycle.

## References

1. D. A. Atwood, M. S. Hill, J. A. Jegier and D. Rutherford, *Organometallics*, 1997, **16**, 2659-2664.
2. P. Hornnirun, E. L. Marshall, V. C. Gibson, R. I. Pugh and A. J. P. White, *Proc. Natl. Acad. Sci. U. S. A.*, 2006, **103**, 15343-15348.
